# Supplementary material for: Doping by design: finding new n-type dopable ABX 4 Zintl phases for thermoelectrics
Source: Royal Society of Chemistry journal article supplement (doi:10.1039/d0ta08238d), 2020-01-01
Supplement: d0ta08238d1.pdf [file d0ta08238d1.pdf]

— **Electronic Supplementary Information** —

# **Doping by Design: Finding New n-type $ABX_4$ Zintl Phases for Thermoelectrics**

Jiaxing Qu,<sup>†</sup> Vladan Stevanović,<sup>‡</sup> Elif Ertekin,<sup>†</sup> and Prashun Gorai<sup>\*,‡</sup>

<sup>†</sup>*University of Illinois at Urbana-Champaign, Urbana, IL 61801*

<sup>‡</sup>*Colorado School of Mines, Golden, CO 80401*

E-mail: pgorai@mines.edu

## 1. Fitted Elemental-Phase Reference Chemical Potentials

The fitted elemental-phase reference energies used in calculating the phase stability region ( $\mu_i^0$  in **Eq. 2**):

Li: -1.74 eV, Na: -1.24 eV, K: -1.14 eV, Rb: -0.82 eV, Cs: -0.96 eV, Al: -3.55 eV, Ga: -3.12 eV, In: -2.62 eV, As: -4.59 eV, Sb: -4.11 eV, Bi: -4.19 eV

## 2. ABX<sub>4</sub> Structures from ICSD Considered for Assessing Structural Stability

RbAlF<sub>4</sub> (123), KAlF<sub>4</sub> (123), CuGaCl<sub>4</sub> (112), CuGaI<sub>4</sub> (82), CuAuSe<sub>4</sub> (11), CuAlCl<sub>4</sub> (112), CuAlBr<sub>4</sub> (112), AgAuTe<sub>4</sub> (13), RbFeF<sub>4</sub> (127), NaMnF<sub>4</sub> (14), CsCrF<sub>4</sub> (189), RbFeF<sub>4</sub> (18), KAlF<sub>4</sub> (11), KFeF<sub>4</sub> (63), RbMnF<sub>4</sub> (14), RbFeF<sub>4</sub> (57), CsFeF<sub>4</sub> (129), TlAlF<sub>4</sub> (15), TlAlF<sub>4</sub> (140), LiMnO<sub>4</sub> (63), NaTiF<sub>4</sub> (60), KAul<sub>4</sub> (14), KAul<sub>4</sub> (14), RbAlF<sub>4</sub> (59), LiAuF<sub>4</sub> (13), LiAuF<sub>4</sub> (15), CsAuF<sub>4</sub> (71), CsMnF<sub>4</sub> (85), AlInI<sub>4</sub> (11), TlMnF<sub>4</sub> (15), KTiF<sub>4</sub> (144), KScF<sub>4</sub> (12), KFeF<sub>4</sub> (31), CsReBr<sub>4</sub> (61).

Numbers in parentheses denote the space group number.

## 3. $\Gamma$ -point Frequencies of Phonon Modes

Table S1:  $\Gamma$ -point phonon frequencies of the 13 Zintl phases predicted to be stable in the KGaSb<sub>4</sub> structure type, given in THz. Only the 10 lowest frequency modes are shown, including the three acoustic modes.

| Compound            | Phonon mode index |       |      |      |      |      |      |      |      |      |
|---------------------|-------------------|-------|------|------|------|------|------|------|------|------|
|                     | 1                 | 2     | 3    | 4    | 5    | 6    | 7    | 8    | 9    | 10   |
| NaGaSb <sub>4</sub> | 0.00              | 0.00  | 0.00 | 0.98 | 1.03 | 1.12 | 1.15 | 1.17 | 1.41 | 1.42 |
| NaAlSb <sub>4</sub> | 0.00              | 0.00  | 0.00 | 0.61 | 0.66 | 0.68 | 0.79 | 0.80 | 0.93 | 0.93 |
| CsInSb <sub>4</sub> | -0.03             | -0.02 | 0.00 | 0.54 | 0.57 | 0.58 | 0.59 | 0.65 | 0.70 | 0.87 |
| CsGaSb <sub>4</sub> | -0.01             | 0.00  | 0.00 | 0.60 | 0.70 | 0.72 | 0.76 | 0.78 | 0.79 | 0.97 |
| RbInSb <sub>4</sub> | 0.00              | 0.00  | 0.00 | 0.55 | 0.57 | 0.59 | 0.64 | 0.68 | 0.69 | 0.90 |
| KInSb <sub>4</sub>  | 0.00              | 0.00  | 0.00 | 0.54 | 0.62 | 0.62 | 0.68 | 0.69 | 0.71 | 0.91 |
| CsAlSb <sub>4</sub> | -0.03             | -0.01 | 0.01 | 0.61 | 0.65 | 0.67 | 0.73 | 0.79 | 0.79 | 0.94 |
| RbGaSb <sub>4</sub> | 0.00              | 0.00  | 0.00 | 0.63 | 0.67 | 0.70 | 0.78 | 0.78 | 0.84 | 1.03 |
| KGaSb <sub>4</sub>  | 0.00              | 0.00  | 0.00 | 0.66 | 0.69 | 0.69 | 0.78 | 0.82 | 0.89 | 1.08 |
| RbAlSb <sub>4</sub> | 0.00              | 0.00  | 0.00 | 0.65 | 0.67 | 0.68 | 0.77 | 0.78 | 0.84 | 1.04 |
| KGaAs <sub>4</sub>  | 0.00              | 0.00  | 0.00 | 0.98 | 1.03 | 1.07 | 1.09 | 1.24 | 1.30 | 1.58 |
| KAlSb <sub>4</sub>  | 0.00              | 0.00  | 0.00 | 0.64 | 0.71 | 0.71 | 0.78 | 0.81 | 0.89 | 1.09 |
| NaGaAs <sub>4</sub> | 0.00              | 0.00  | 0.00 | 0.62 | 0.67 | 0.68 | 0.71 | 0.82 | 0.87 | 0.88 |

#### 4. Electronic Structures of Stable $ABX_4$ Zintl Phases

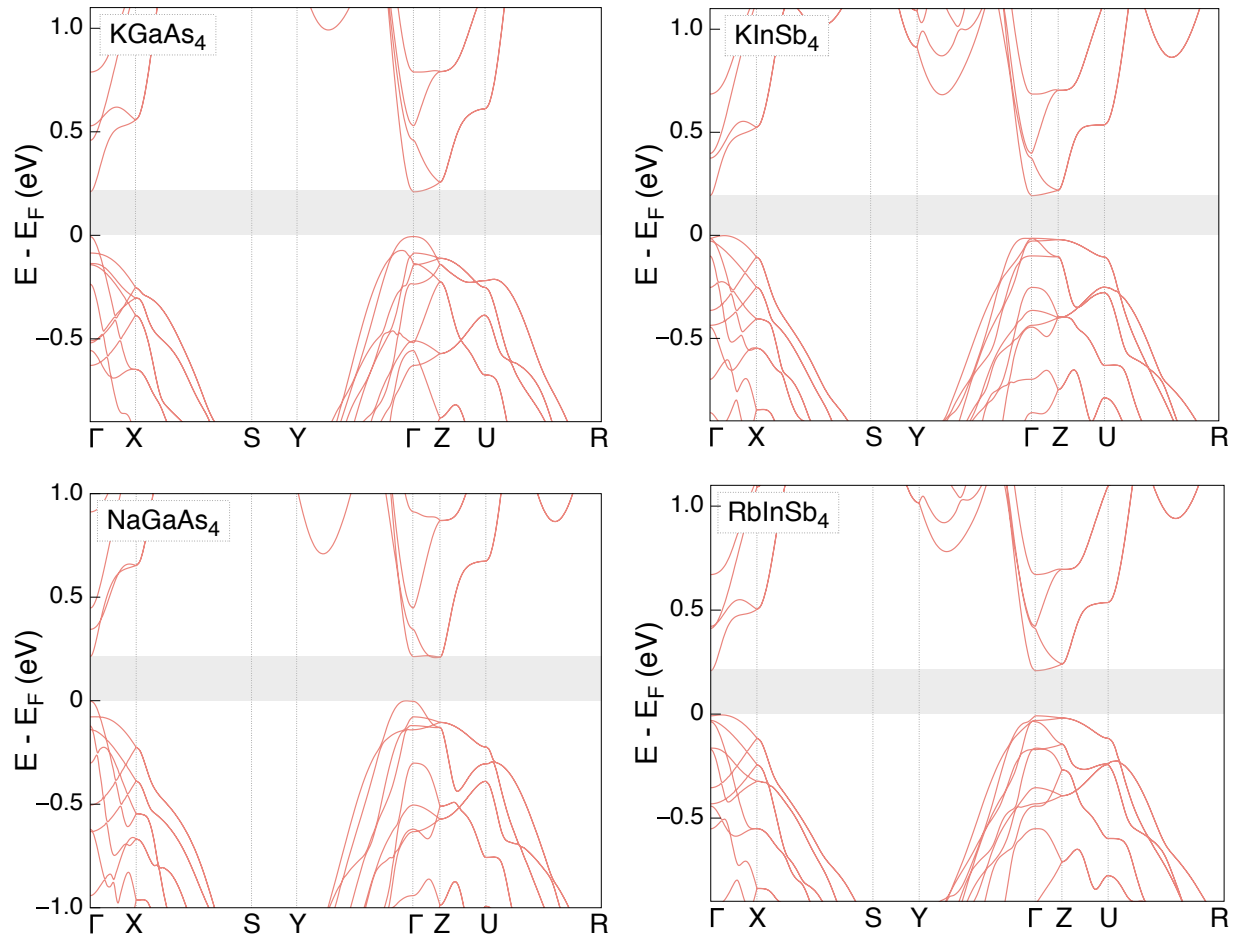

Figure S1: Electronic structures (GGA-PBE) of  $KGaAs_4$ ,  $KInSb_4$ ,  $NaGaAs_4$ , and  $RbInSb_4$  along the special  $k$ -point paths of the Brillouin zone.

## 5. Electronic Structure of CsInSb<sub>4</sub> with Spin-Orbit Coupling

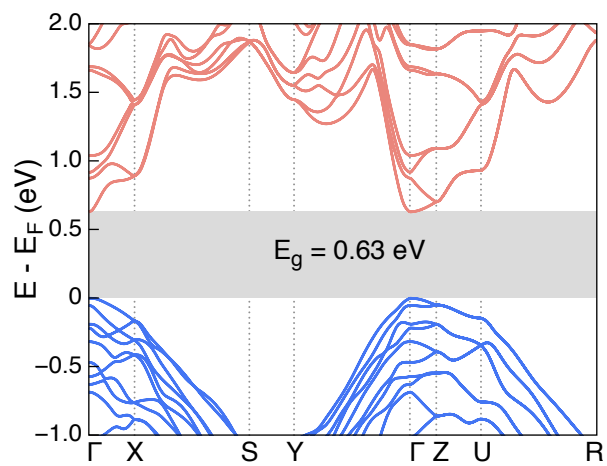

Figure S2: Electronic structure of CsInSb<sub>4</sub> along the special  $k$ -point paths of the Brillouin zone. Note that the band edge positions are obtained from GW quasi-particle energy calculations and spin-orbit coupling (at the DFT level of theory).

## 6. Predicted Thermoelectric Performance

Table S2: Computed electronic structure and transport parameters, and thermoelectric performance of 13 ABX<sub>4</sub> Zintl phases that are predicted to be stable in the KGaSb<sub>4</sub> structure.  $\beta$  is referenced to  $\beta$  of PbTe (15 for both  $p$ - and  $n$ -type).  $\beta_p$  and  $\beta_n$  are  $p$ - and  $n$ -type thermoelectric quality factor,  $E_g$  is DFT band gap,  $B$  is bulk modulus,  $m_{\text{DOS,VB}}^*$ ,  $m_{\text{DOS,CB}}^*$  and  $m_{\text{DOS,CB}}^*$  are density-of-states effective masses of valence and conduction bands,  $N_{\text{b,VB}}$  and  $N_{\text{b,CB}}$  are valence and conduction band degeneracies,  $\mu_p$  and  $\mu_n$  are room-temperature hole and electron mobilities, and  $\kappa_L$  is room-temperature lattice thermal conductivity.

| Phases              | $\beta_p/\beta_{\text{PbTe}}$ | $\beta_n/\beta_{\text{PbTe}}$ | $E_g$ (eV) | $B$ (GPa) | $m_{\text{DOS,VB}}^*$ ( $m_e$ ) | $m_{\text{DOS,CB}}^*$ ( $m_e$ ) | $N_{\text{b,VB}}$ | $N_{\text{b,CB}}$ | $\mu_p$ ( $\text{cm}^2/\text{Vs}$ ) | $\mu_n$ ( $\text{cm}^2/\text{Vs}$ ) | $\kappa_L$ (W/mK) |
|---------------------|-------------------------------|-------------------------------|------------|-----------|---------------------------------|---------------------------------|-------------------|-------------------|-------------------------------------|-------------------------------------|-------------------|
| NaGaSb <sub>4</sub> | 0.7                           | 4.8                           | 0.19       | 19.9      | 0.43                            | 0.33                            | 2                 | 7                 | 17                                  | 88                                  | 1.0               |
| NaAlSb <sub>4</sub> | 0.7                           | 4.5                           | 0.12       | 19.8      | 0.43                            | 0.24                            | 2                 | 6                 | 17                                  | 124                                 | 1.0               |
| CsInSb <sub>4</sub> | 1.0                           | 1.7                           | 0.25       | 29.0      | 1.59                            | 0.14                            | 4                 | 2                 | 7                                   | 136                                 | 1.2               |
| CsGaSb <sub>4</sub> | 0.5                           | 1.7                           | 0.30       | 18.9      | 0.80                            | 0.11                            | 2                 | 2                 | 6                                   | 117                                 | 0.9               |
| RbInSb <sub>4</sub> | 1.1                           | 1.6                           | 0.22       | 28.8      | 1.29                            | 0.13                            | 4                 | 2                 | 9                                   | 141                                 | 1.2               |
| KInSb <sub>4</sub>  | 1.5                           | 1.6                           | 0.19       | 30.3      | 1.32                            | 0.13                            | 5                 | 2                 | 12                                  | 150                                 | 1.3               |
| CsAlSb <sub>4</sub> | 0.8                           | 1.5                           | 0.32       | 19.3      | 1.00                            | 0.59                            | 3                 | 2                 | 7                                   | 98                                  | 0.9               |
| RbGaSb <sub>4</sub> | 1.1                           | 1.5                           | 0.30       | 19.0      | 0.51                            | 0.12                            | 3                 | 2                 | 19                                  | 105                                 | 0.9               |
| KGaSb <sub>4</sub>  | 0.3                           | 1.5                           | 0.25       | 19.2      | 0.30                            | 0.12                            | 1                 | 2                 | 14                                  | 106                                 | 1.0               |
| RbAlSb <sub>4</sub> | 0.3                           | 1.4                           | 0.26       | 19.3      | 0.34                            | 0.14                            | 1                 | 2                 | 12                                  | 88                                  | 1.0               |
| KGaAs <sub>4</sub>  | 0.8                           | 1.4                           | 0.22       | 26.9      | 0.85                            | 0.14                            | 3                 | 2                 | 12                                  | 123                                 | 1.4               |
| KAlSb <sub>4</sub>  | 0.3                           | 1.3                           | 0.21       | 19.6      | 0.26                            | 0.14                            | 1                 | 2                 | 18                                  | 93                                  | 1.0               |
| NaGaAs <sub>4</sub> | 0.5                           | 1.2                           | 0.21       | 28.2      | 0.71                            | 0.18                            | 2                 | 2                 | 11                                  | 93                                  | 1.4               |

## 7. Defect Chemistry of $ABX_4$ Zintl Phases Under Alkali-Poor Conditions

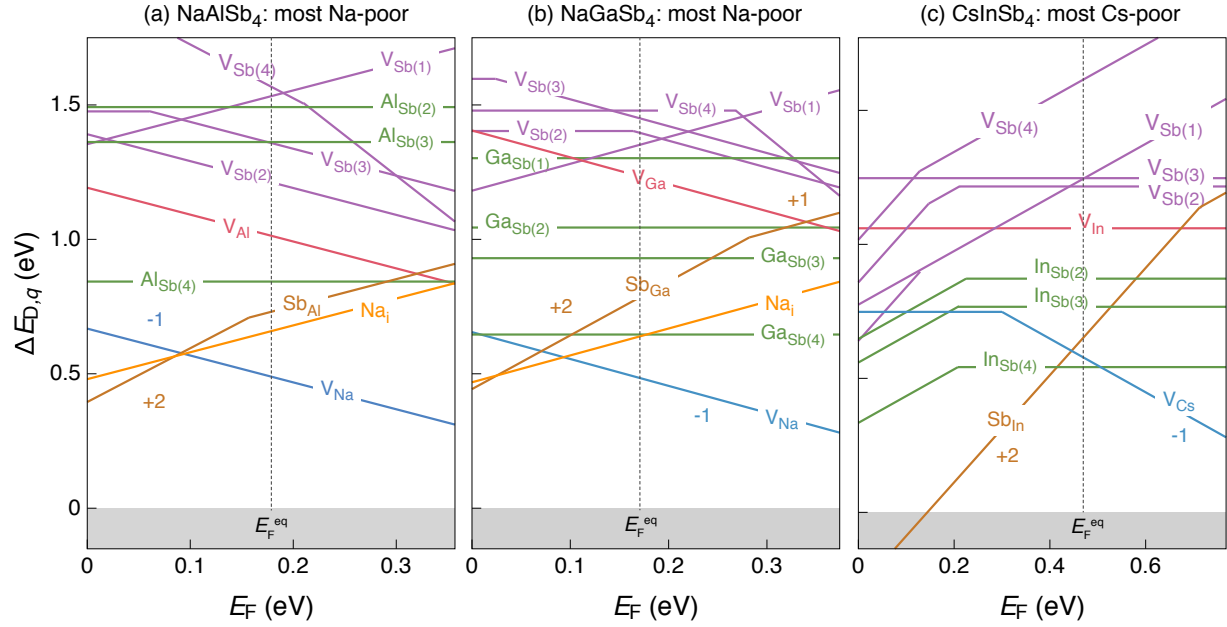

Figure S3: Formation energies of native defects ( $\Delta E_{D,q}$ ) as a function of Fermi energy ( $E_F$ ) for (a) NaAlSb<sub>4</sub> (under the most Na-poor conditions), (b) NaGaSb<sub>4</sub> (under the most Na-poor condition), (c) CsInSb<sub>4</sub> (under the most Cs-poor condition).  $E_F$  is referenced to the valence band maximum and  $E_F$  values can range from 0 to the band gap. The slope of the line is equal to the charge state of the defect. The lowest energy acceptors are alkali vacancies (in blue). The equilibrium  $E_F$  (dashed vertical lines) is calculated at 800 K.

## 8. Optimized Crystal Structures of 7 New $ABX_4$ Zintl Phases

VASP POSCAR files available at:

[github.com/prashungorai/papers/tree/main/2020/abx4zintl](https://github.com/prashungorai/papers/tree/main/2020/abx4zintl)
